# Supplementary material
Source: bioRxiv or medRxiv preprint supplement (https://www.biorxiv.org/highwire/filestream/130491/field_highwire_adjunct_files/9/434654-7.pdf)
Supplement: Supplementary file [file 434654-7.pdf]

1 **Table S6.** Effects of warming and precipitation treatments (fixed effects) on (log  
2 transformed) Fungi:Bacteria ratios in the summer and the fall, using a mixed-effects model  
3 that included the fixed effect of time and the random effect of blocks. P values for Type III  
4 sum of squares with a Satterthwaite approximation for the degrees of freedom. Significance  
5 codes: 0.05 < P < 0.1 ‘†’.

6

|                      | Sum. Sq. | Mean Sq. | num df | den df | F     | P       |
|----------------------|----------|----------|--------|--------|-------|---------|
| <b>Precip</b>        | 0.0004   | 0.0002   | 2      | 72.013 | 1.538 | 0.221   |
| <b>Temp</b>          | 0.0010   | 0.0003   | 3      | 72.013 | 2.544 | 0.063 † |
| <b>Season</b>        | 0.0003   | 0.0003   | 1      | 72.013 | 2.198 | 0.143   |
| <b>Precip:Temp</b>   | 0.0006   | 0.0001   | 6      | 72.013 | 0.812 | 0.564   |
| <b>Precip:Season</b> | 0.0004   | 0.0002   | 2      | 72.013 | 1.695 | 0.191   |
| <b>Temp:Season</b>   | 0.0006   | 0.0002   | 3      | 72.013 | 1.530 | 0.214   |

7
